# Supplementary material for: Antihyperlipidemic Effect, Identification and Isolation of the Lipophilic Components from Artemisia integrifolia
Source: MDPI journal article supplement (doi:10.3390/molecules24040725), 2019-02-17
Supplement: s1 [file s1]

18070802  
huangse-2  
in dmsO 1H

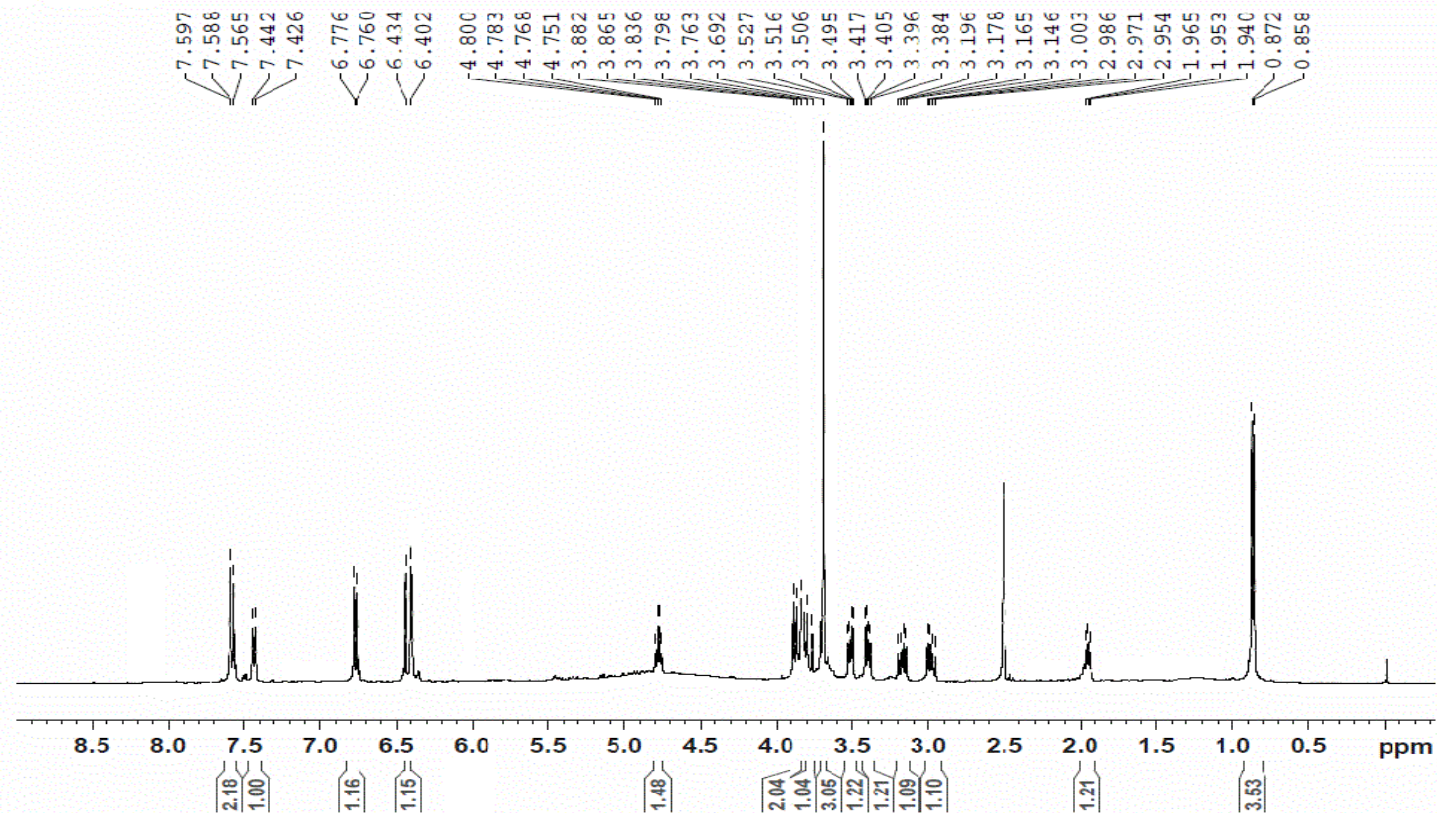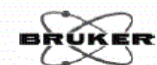

Current Data Parameters  
NAME 18070802  
EXPNO 1  
PROCNO 1

F2 - Acquisition Parameters  
Date\_ 20180708  
Time 19.00  
INSTRUM spect  
PROBHD 5 mm DAIKO BB/  
PULPROG zgpg30  
TD 65536  
SOLVENT DMSO  
NS 16  
DS 2  
SWH 10000.000 Hz  
FIDRES 0.152588 Hz  
AQ 2.375799 sec  
RG 62.56  
DW 50.000 usec  
DE 6.50 usec  
TE 292.6 K  
D1 1.00000000 sec  
TDO 1

----- CHANNEL F1 -----  
NUC1 1H  
P1 11.25 usec  
PL1 14.00000000 W

F2 - Processing parameters  
SI 65536  
SF 500.1300000 MHz  
WDW EM  
SSB 0  
LB 0.30 Hz  
GB 0  
PC 1.00

Figure S1. <sup>1</sup>H-NMR spectra of compound 4

18070802  
 huangse-2  
 in dmsO C13CPD

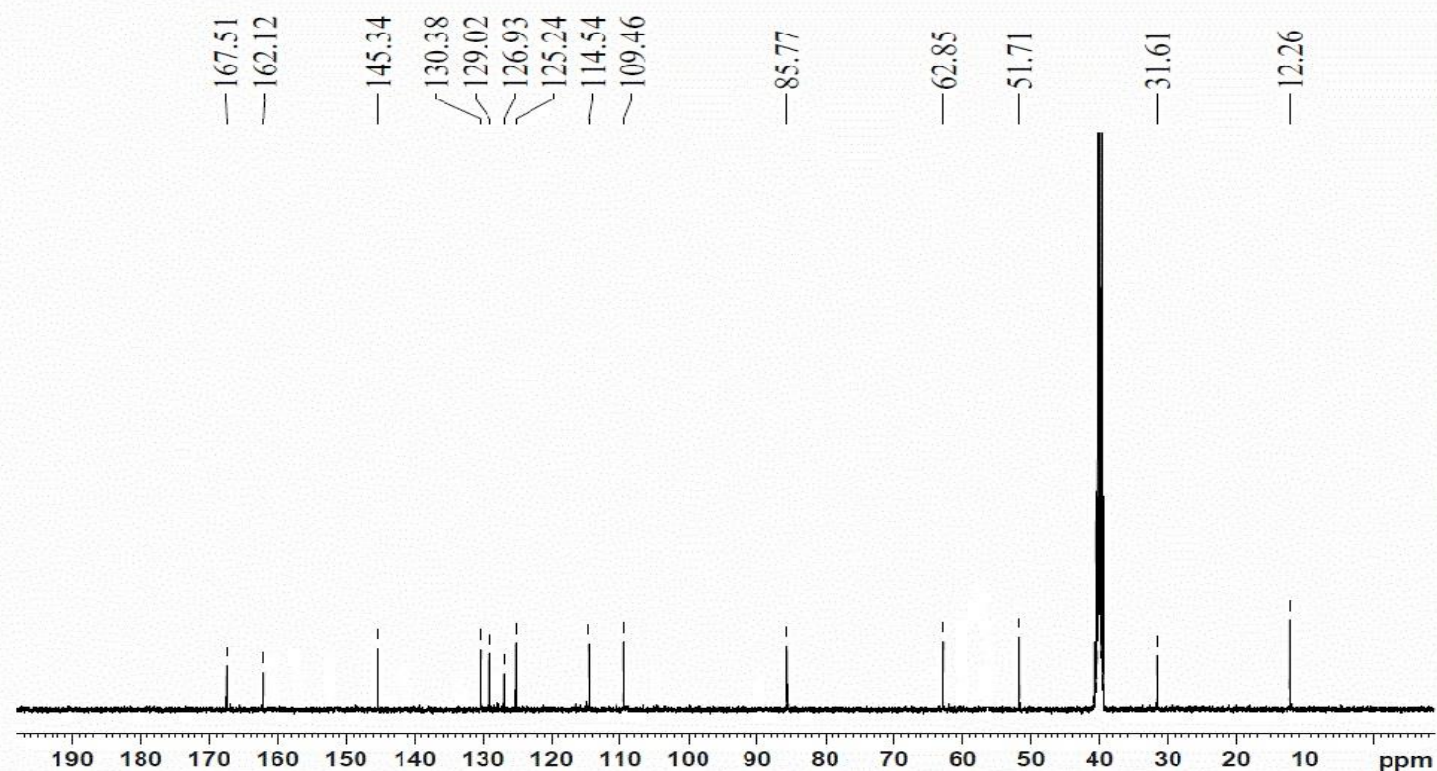

**BRUKER**

Current Data Parameters  
 NAME 18070802  
 EXPNO 2  
 PROCNO 1

F2 - Acquisition Parameters  
 Date\_ 20180708  
 Time 10.03  
 INSTRUM spect  
 PULPROG zgpg30  
 TD 65536  
 SOLVENT DMSO  
 NS 512  
 DS 4  
 SWH 29741.904 Hz  
 FIDRES 0.404131 Hz  
 AQ 1.1010043 sec  
 RG 193.01  
 DM 16.800 usec  
 DE 6.50 usec  
 TE 293.2 K  
 D1 4.0000000 sec  
 T2 0.0000000 sec  
 T20 100

----- CHANNEL F1 -----  
 SFO1 125.770464 MHz  
 NUC1 13C  
 P1 9.50 usec  
 PLW1 75.0000000 W

----- CHANNEL F2 -----  
 SFO2 500.132000 MHz  
 NUC2 1H  
 P2 14.0000000 usec  
 PLW2 14.0000000 W  
 PLW3 0.29435000 W

F2 - Processing parameters  
 SI 32768  
 SF 125.757788 MHz  
 WDM RM  
 SSB 0  
 LB 1.00 Hz  
 GB 0  
 PC 1.43

Figure S2.  $^{13}\text{C}$ -NMR spectra of compound **4**

18070802  
huangse-2  
in dmsd HSQCRTGPSTSP

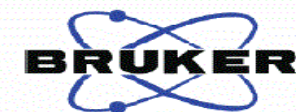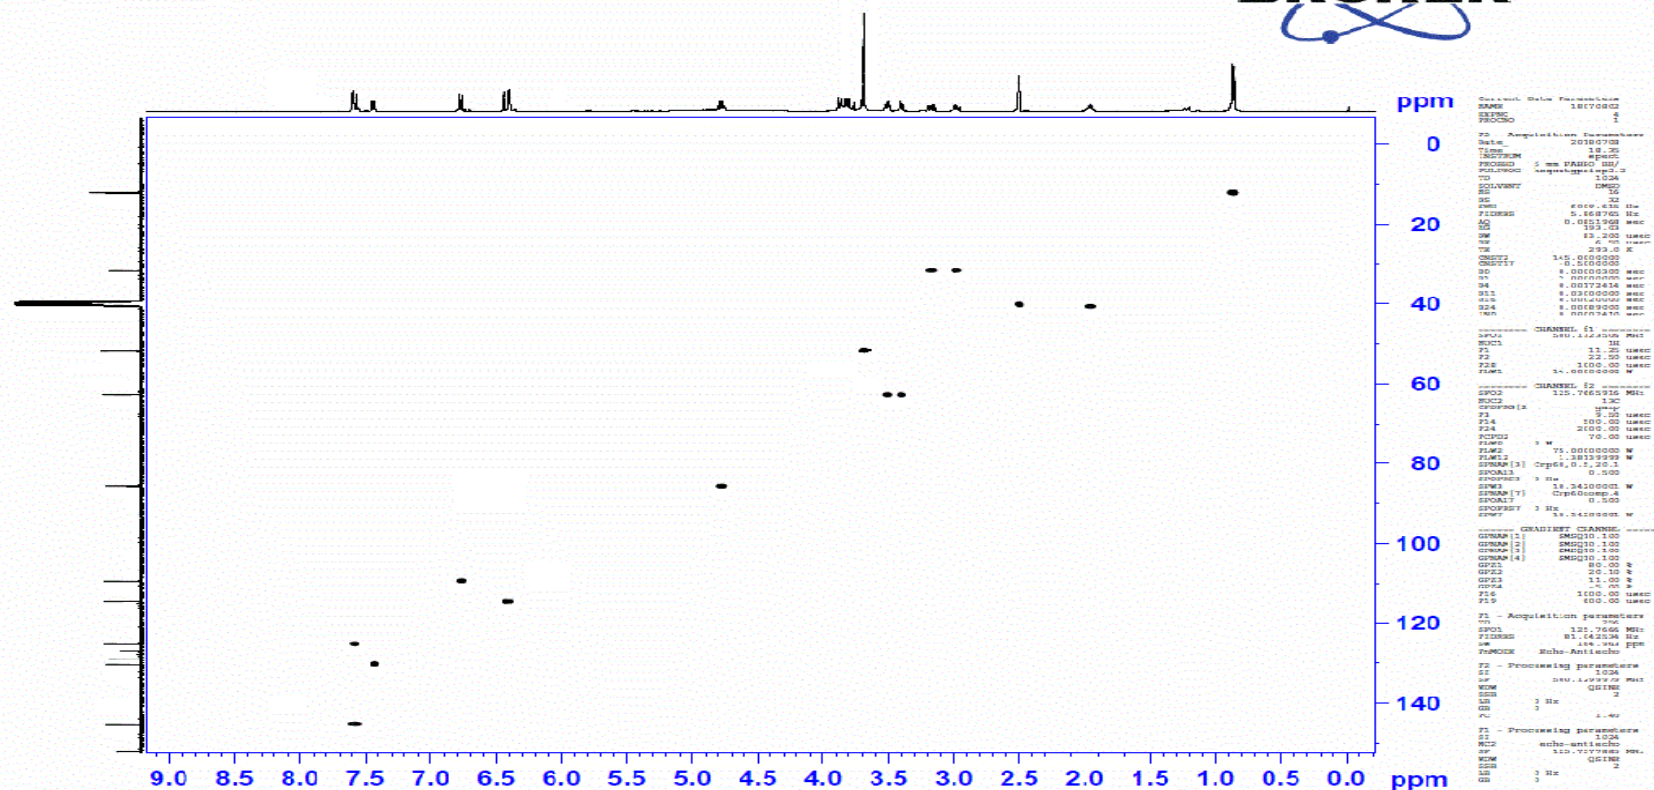

Figure S3. HSQC spectra of compound 4



18070802  
huangse-2  
in dmsc HMBCGPND

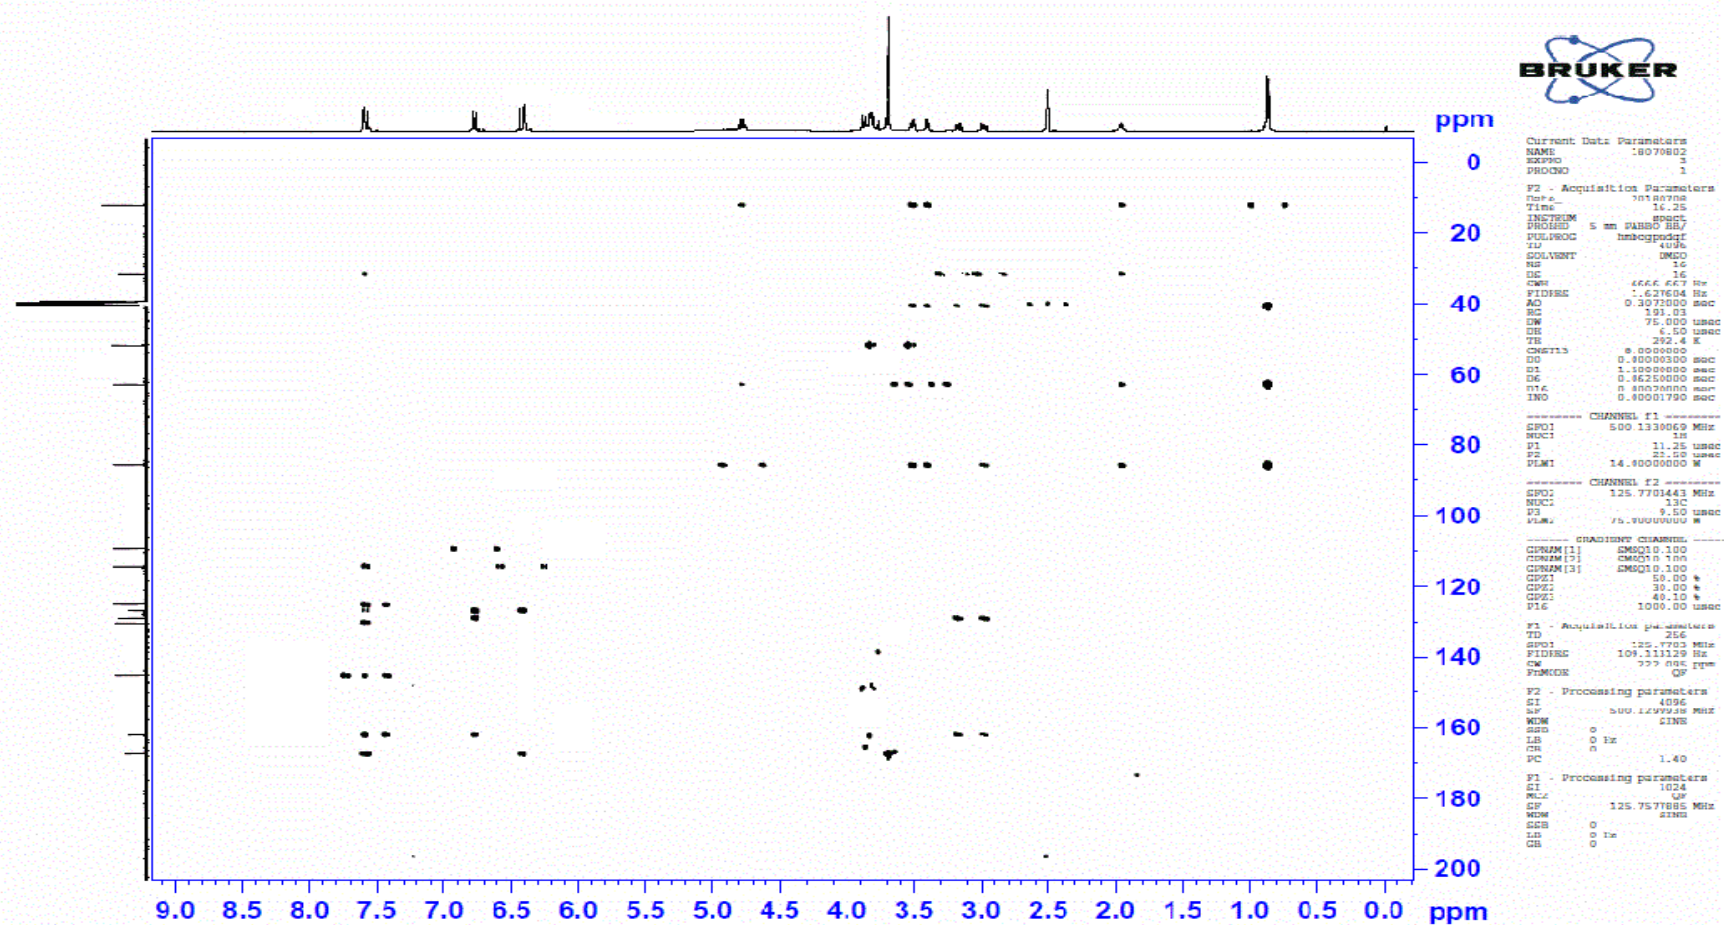

Figure S4. HMBC spectra of compound 4

18070802  
huangse-2  
in dmsO C13DEPT135

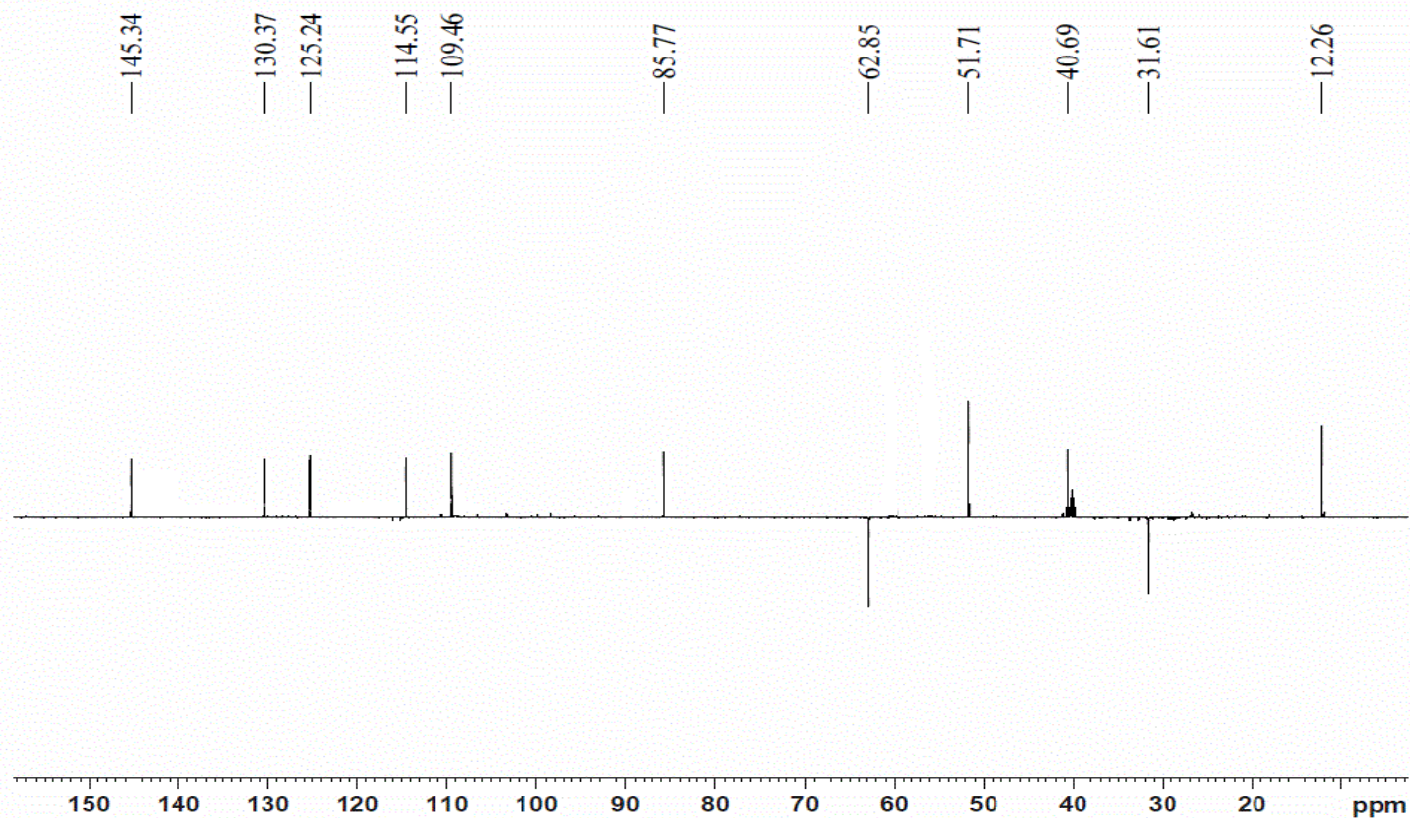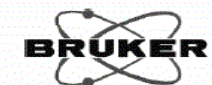

Current Data Parameters  
NAME 18070802  
EXPNO 1  
PROCNO 1

F2 - Acquisition Parameters  
Date\_ 20180708  
Time 22.18  
INSTRUM spect  
PROBHD 5 mm PABBO BB/  
PULPROG zgpg30  
TD 65536  
SOLVENT DMSO  
NS 6400  
DS 4  
SWH 20161.293 Hz  
FIDRES 0.307637 Hz  
AQ 1.6252928 sec  
RG 133.00  
DW 24.800 usec  
DE 6.50 usec  
TE 300.2 K  
CNS2 145.0000000  
D1 4.0000000 sec  
D2 0.00344828 sec  
D12 0.0000200 sec  
TD0 1.00

----- CHANNEL f1 -----  
SFO1 125.767848 MHz  
NUC1 13C  
P1 9.50 usec  
PL1 0 dB  
PLW0 0 W  
PLW1 75.0000000 W  
SPNAM[S] Crp60comp.4  
SFOALS 0 Hz  
SFOFFS 0 Hz  
CPWG 10.34200003 W

----- CHANNEL f2 -----  
SFO2 500.1315998 MHz  
NUC2 1H  
CPOPR3[2] waltz16  
P3 11.60 usec  
PL3 0 dB  
PCPD2 80.00 usec  
PLW2 14.0000000 W  
PLW3 0.39426000 W

F2 - Processing parameters  
SI 32768  
SF 125.7577888 MHz  
WDW EM  
SFB 0  
LW 1.00 Hz  
GB 0  
PC 1.40

Fig. S5 DEPT spectrum of compound 4

18070802  
huangse-2  
in dms0 COSYGPMFSW

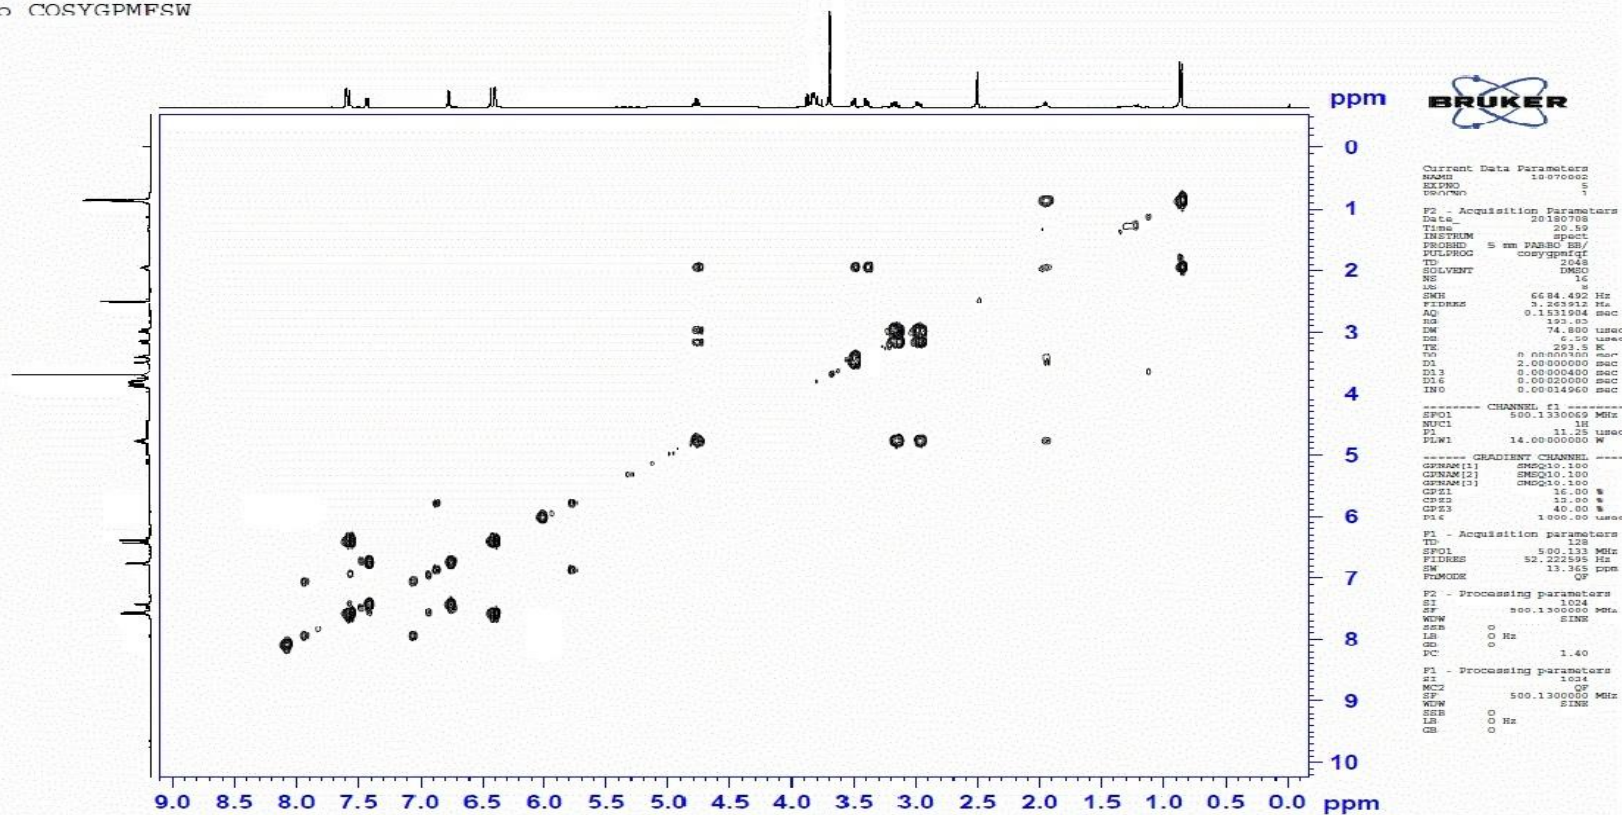

Fig. S6 COSY spectrum of compound 4
